# Supplementary material
Source: Springer Nature journal article supplement (https://www.springermedizin.de/resource/supplementary/12906_2013_1617_MOESM3_ESM.pdf/9522632)

(A)

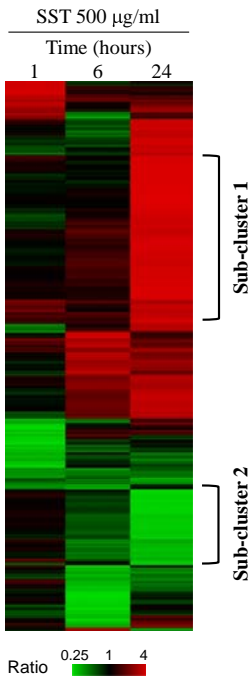

(B)

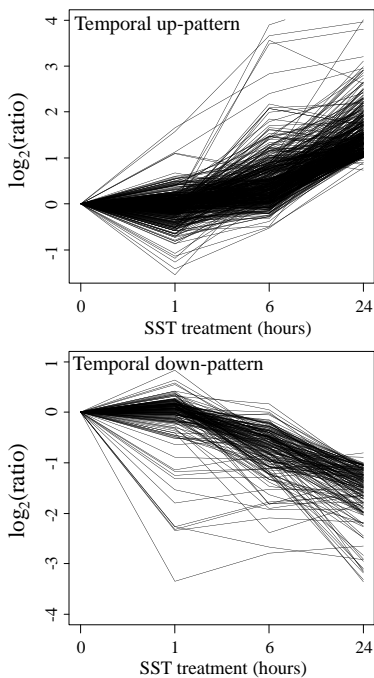

(C)

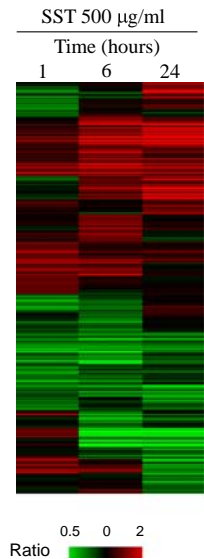

Supplement: MOESM3 [file 9522632]
